# Supplementary material for: Role of microRNA-4516 involved autophagy associated with exposure to fine particulate matter
Source: PubMed Central journal article supplement (PMC5216729; doi:10.18632/oncotarget.9978), 2016-06-13
Supplement: oncotarget-07-45385-s001.pdf [file oncotarget-07-45385-s001.pdf]

# Role of microRNA-4516 involved autophagy associated with exposure to fine particulate matter

## Supplementary Materials

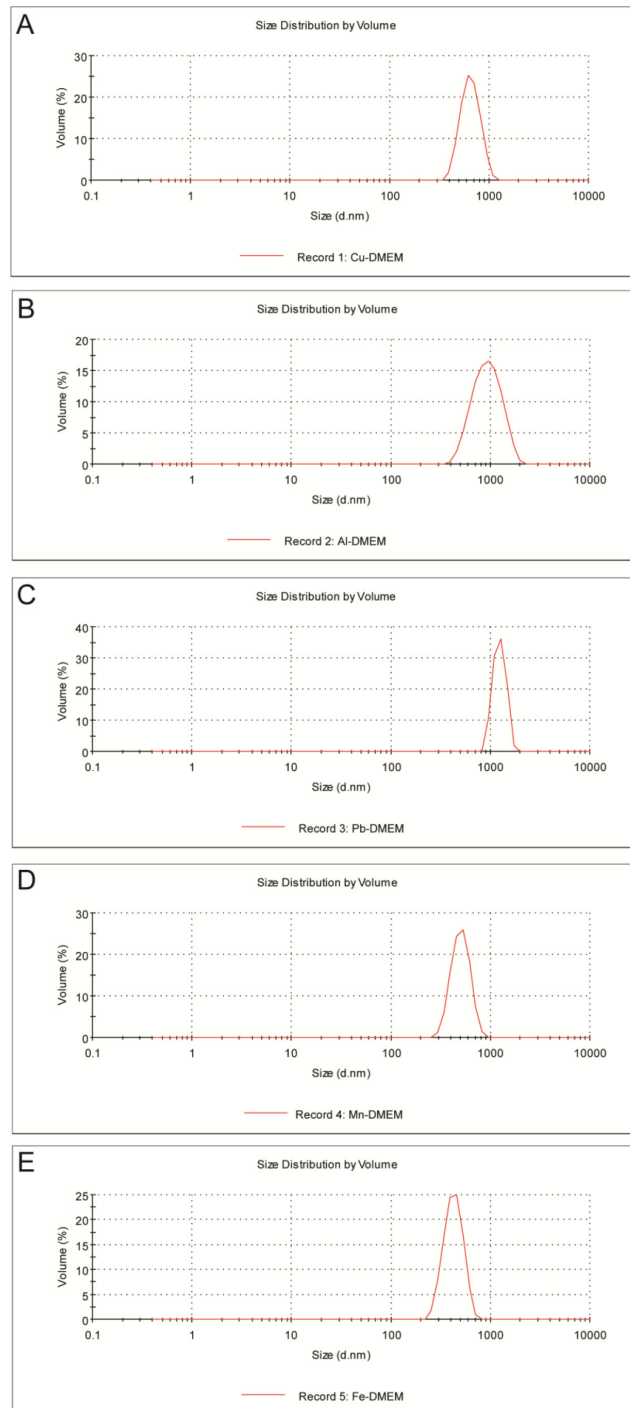

**Supplementary Figure S1: Size distribution of metal particles.** The metal particles were suspended in DMED culture medium with a final concentration of 1 mg/ml, and dispersed by ultrasonication for 15 min. Then the size distribution of metal particles were immediately evaluated by a zetasizer (nano-zs90, Malvern Instruments, UK). (A) Mean size of Cu particles is 632.7 nm. (B) Mean size of Al particles is 964 nm. (C) Mean size of Pb particles is 1242 nm. (D) Mean size of Mn particles is 511.7 nm. (E) Mean size of Fe particles is 683.5 nm.

**Supplementary Table S1: miRNA microarray predicted modulation of miRNA in PM<sub>2.5</sub> treated A549 cells**

| microRNA        | Fold change | FDR   |
|-----------------|-------------|-------|
| hsa-miR-4516    | 9.687       | 0.031 |
| hsa-miR-4732-5p | 5.867       | 0.034 |
| hsa-miR-4778-5p | 5.563       | 0.037 |
| hsa-miR-4449    | 5.352       | 0.014 |
| hsa-miR-3201    | 5.278       | 0.014 |
| hsa-miR-675-5p  | 4.360       | 0.037 |
| hsa-miR-638     | 3.944       | 0.014 |
| hsa-miR-1469    | 3.907       | 0.014 |
| hsa-miR-204-3p  | 3.212       | 0.037 |
| hsa-miR-4750-5p | 2.967       | 0.037 |
| hsa-miR-3940-5p | 2.848       | 0.014 |
| hsa-miR-652-5p  | 2.710       | 0.041 |
| hsa-miR-3611    | 2.660       | 0.022 |
| hsa-miR-802     | 0.172       | 0.049 |
| hsa-miR-4319    | 0.246       | 0.037 |
| hsa-miR-1322    | 0.253       | 0.049 |
| hsa-miR-3176    | 0.260       | 0.014 |
| hsa-miR-933     | 0.260       | 0.037 |
| hsa-miR-4536-3p | 0.317       | 0.034 |
| hsa-miR-4445-3p | 0.345       | 0.049 |

**Supplementary Table S2: miR-4516 expression by individuals' characteristics**

| Variable   | good air quality city |                         |                 | Moderate air pollution city |                         |                 |
|------------|-----------------------|-------------------------|-----------------|-----------------------------|-------------------------|-----------------|
|            | <i>n</i>              | miR-4516 (mean, 95% CI) | <i>P</i> -value | <i>n</i>                    | miR-4516 (mean, 95% CI) | <i>P</i> -value |
| Age, years |                       |                         |                 |                             |                         |                 |
| < 40       | 38                    | 13.87 (13.29, 14.45)    |                 | 42                          | 9.776 (8.941, 10.61)    |                 |
| 40–50      | 44                    | 13.38 (12.87, 13.89)    |                 | 40                          | 9.771 (8.978, 10.56)    |                 |
| > 50       | 38                    | 13.32 (12.75, 13.90)    | 0.3144          | 38                          | 10.86 (10.03, 11.70)    | 0.1022          |
| Sex        |                       |                         |                 |                             |                         |                 |
| Male       | 60                    | 13.48 (13.01, 13.96)    |                 | 60                          | 9.713 (9.075, 10.35)    |                 |
| Female     | 60                    | 13.50 (13.07, 13.93)    | 0.9590          | 60                          | 10.52 (9.830, 11.21)    | 0.0881          |

**Supplementary Table S3: Down-regulations of proteins encoded by miR-4516 target genes**

| Gene symbol | mRNA encoded protein function                                                          | Fold Change                |                             |
|-------------|----------------------------------------------------------------------------------------|----------------------------|-----------------------------|
|             |                                                                                        | Low dose PM <sub>2.5</sub> | High dose PM <sub>2.5</sub> |
| RPL37       | 60S ribosomal protein L37                                                              | 0.865                      | 0.39                        |
| FSTL1       | follistatin-related protein 1 precursor                                                | 0.895                      | 0.666                       |
| PER1        | PREDICTED: period circadian protein homolog 1 isoform X2                               | 0.75                       | 0.593                       |
| U2AF2       | splicing factor U2AF 65 kDa subunit isoform b                                          | 0.521                      | 0.33                        |
| AKAP17A     | A-kinase anchor protein 17A isoform 1                                                  | 0.82                       | 0.633                       |
| PRKCB       | protein kinase C beta type isoform 1                                                   | 0.958                      | 0.614                       |
| SUB1        | activated RNA polymerase II transcriptional coactivator p15                            | 0.734                      | 0.449                       |
| BET1        | BET1 homolog                                                                           | 0.729                      | 0.595                       |
| LIX1L       | LIX1-like protein                                                                      | 0.925                      | 0.645                       |
| CSF1        | macrophage colony-stimulating factor 1 isoform c precursor                             | 0.769                      | 0.576                       |
| PPP2R3A     | serine/threonine-protein phosphatase 2A regulatory subunit B'' subunit alpha isoform 3 | 0.854                      | 0.335                       |
| PRPF38B     | pre-mRNA-splicing factor 38B                                                           | 0.652                      | 0.598                       |
| LUC7L       | putative RNA-binding protein Luc7-like 1 isoform b                                     | 0.464                      | 0.213                       |
| POLR1D      | DNA-directed RNA polymerases I and III subunit RPAC2 isoform 3                         | 0.954                      | 0.557                       |
| PLOD2       | procollagen-lysine,2-oxoglutarate 5-dioxygenase 2 isoform 1 precursor                  | 0.75                       | 0.659                       |
| MTUS1       | PREDICTED: microtubule-associated tumor suppressor 1 isoform X3                        | 0.734                      | 0.655                       |
| UBA52       | ubiquitin-60S ribosomal protein L40 precursor                                          | 0.858                      | 0.31                        |
| RSRC2       | PREDICTED: arginine/serine-rich coiled-coil protein 2 isoform X4                       | 0.72                       | 0.589                       |
| FAM105A     | inactive ubiquitin thioesterase FAM105A                                                | 0.902                      | 0.623                       |
| HIF1A       | hypoxia-inducible factor 1-alpha isoform 1                                             | 0.79                       | 0.649                       |
| C1orf35     | multiple myeloma tumor-associated protein 2                                            | 0.81                       | 0.622                       |
| PPIL4       | peptidyl-prolyl cis-trans isomerase-like 4                                             | 0.966                      | 0.612                       |
| MELK        | maternal embryonic leucine zipper kinase isoform 2                                     | 0.756                      | 0.568                       |
| C19orf53    | leydig cell tumor 10 kDa protein homolog                                               | 0.795                      | 0.464                       |
| LLPH        | protein LLP homolog                                                                    | 0.86                       | 0.637                       |

### Supplementary Table S4: Sub-ontology molecular function enrichment of miR-4516 target genes

| Enrichment Term                             | Involved Genes                                    |
|---------------------------------------------|---------------------------------------------------|
| GO:0046872 metal ion binding                | PPP2R3A, PLOD2, RPL37, FSTL1, LUC7L, UBA52, PRKCB |
| GO:0043169 cation binding                   | PPP2R3A, PLOD2, RPL37, FSTL1, LUC7L, UBA52, PRKCB |
| GO:0043167 ion binding                      | PPP2R3A, PLOD2, RPL37, FSTL1, LUC7L, UBA52, PRKCB |
| GO:0046914 transition metal ion binding     | PLOD2, RPL37, LUC7L, UBA52, PRKCB                 |
| GO:0000166 nucleotide binding               | U2AF2, PPIL4, MELK, PRKCB                         |
| GO:0008270 zinc ion binding                 | RPL37, LUC7L, UBA52, PRKCB                        |
| GO:0046983 protein dimerization activity    | HIF1A, POLR1D, CSF1                               |
| GO:0003723 RNA binding                      | U2AF2, PPIL4, RPL37                               |
| GO:0005509 calcium ion binding              | PPP2R3A, FSTL1, PRKCB                             |
| GO:0030528 transcription regulator activity | HIF1A, SUB1, UBA52                                |
| GO:0003677 DNA binding                      | HIF1A, POLR1D, SUB1                               |

### Supplementary Table S5: Sub-ontology enrichment terms of biological process (BP)

| Term                                                               | Genes              |
|--------------------------------------------------------------------|--------------------|
| GO:0051240 positive regulation of multicellular organismal process | HIF1A, CSF1, UBA52 |
| GO:0045639 positive regulation of myeloid cell differentiation     | HIF1A, CSF1        |
| GO:0010647 positive regulation of cell communication               | HIF1A, CSF1, UBA52 |
| GO:0016202 regulation of striated muscle tissue development        | LUC7L, UBA52       |
| GO:0048634 regulation of muscle development                        | LUC7L, UBA52       |
| GO:0045637 regulation of myeloid cell differentiation              | HIF1A, CSF1        |

### Supplementary Table S6: Sub-ontology enrichment terms of cellular component (CC)

| Term                          | Genes        |
|-------------------------------|--------------|
| GO:0022626 cytosolic ribosome | RPL37, UBA52 |
| GO:0033279 ribosomal subunit  | RPL37, UBA52 |
| GO:0044445 cytosolic part     | RPL37, UBA52 |

### Supplementary Table S7: Increment of miR-4516 expression between baseline and postexposure levels by individuals' characteristics

| Variable   | good air quality city |                         |                 |
|------------|-----------------------|-------------------------|-----------------|
|            | <i>n</i>              | miR-4516 (mean, 95% CI) | <i>P</i> -value |
| Age, years |                       |                         |                 |
| < 40       | 10                    | 1.43 (-0.96, 3.81)      |                 |
| 40–50      | 9                     | 1.90 (0.31, 3.48)       |                 |
| > 50       | 11                    | 0.48 (-1.44, 2.40)      | 0.5259          |
| Sex        |                       |                         |                 |
| Male       | 15                    | 0.77 (-0.51, 2.04)      |                 |
| Female     | 15                    | 1.67 (-0.11, 3.46)      | 0.3820          |
